# Supplementary material
Source: PubMed Central journal article supplement (PMC2553712)
Supplement: NIHMS62811-supplement-1si20070825_07.pdf [file NIHMS62811-supplement-1si20070825_07.pdf]

**JA074725F**

## **Supporting Information**

Design, Synthesis and Characterization of A Potent, Non-Peptide, Cell-Permeable, Bivalent  
Smac Mimetic that Concurrently Targets both the BIR2 and BIR3 Domains in XIAP

*Haiying Sun<sup>+</sup>, Zaneta Nikolovska-Coleska<sup>+</sup>, Jianfeng Lu<sup>+</sup>, Jennifer L. Meagher<sup>∩</sup>, Chao-Yie  
Yang<sup>+</sup>, Su Qiu<sup>+</sup>, York Tomita<sup>¶</sup>, Yumi Ueda<sup>¶</sup>, Sheng Jiang<sup>#</sup>, Krzysztof Krajewski<sup>#</sup>, Peter P.  
Roller<sup>#</sup>, Jeanne A. Stuckey<sup>∩†</sup>, and Shaomeng Wang<sup>+\*</sup>*

<sup>+</sup>Departments of Internal Medicine, Pharmacology and Medicinal Chemistry and Comprehensive  
Cancer Center, <sup>∩</sup>Life Sciences Institute, and <sup>†</sup> Biological Chemistry, Biophysics Research  
Division, University of Michigan, 1500 E. Medical Center Drive, Ann Arbor, MI 48109, USA;  
<sup>¶</sup>Lombardi Cancer Center, Georgetown University Medical Center, Washington DC 20007,  
USA; <sup>#</sup>Laboratory of Medicinal Chemistry, National Cancer Institute-Frederick, NIH, Frederick,  
Maryland 21702, USA.

CORRESPONDING AUTHOR:

Shaomeng Wang, Phone: (734) 615-0362; Fax: (734) 647-9647; Email: [shaomeng@umich.edu](mailto:shaomeng@umich.edu)

Complete References:

24. Oost, T. K.; Sun, C.; Armstrong, R. C.; Al-Assaad, A.-S.; Betz, S. F.; Deckwerth, T. L.; Ding, H.; Elmore, S. W.; Meadows, R. P.; Olejniczak, E. T.; Oleksijew, A.; Oltersdorf, T.; Rosenberg, S. H.; Shoemaker, A. R.; Tomaselli, K. J.; Zou, H.; Fesik, S. W. *J. Med. Chem.* **2004**, *47*, 4417-4426.

27. Schimmer, A. D.; Welsh, K.; Pinilla, C.; Wang, Z.; Krajewska, M.; Bonneau, M. J.; Pedersen, I. M.; Kitada, S.; Scott, F. L.; Bailly-Maitre, B.; Glinsky, G.; Scudiero, D.; Sausville, E.; Salvesen, G.; Nefzi, A.; Ostresh, J. M.; Houghten, R. A.; Reed, J. C. *Cancer Cell*, **2004**, *5*, 25-35.

39. Case, D. A.; Pearlman, D. A.; Caldwell, J. W.; Cheatham III, T. E.; Wang, J.; Ross, W. S.; Simmerling, C. L.; Darden, T. A.; Merz, K. M.; Stanton, R. V.; Cheng, A. L.; Vincent, J. J.; Crowley, M.; Tsui, V.; Gohlke, H.; Radmer, R. J.; Y. Duan; Pitera, J.; Massova, I.; Seibel, G. L.; Singh, U. C.; Weiner, P. K.; Kollman, P. A. *AMBER7*, University of California, San Francisco, **2002**.

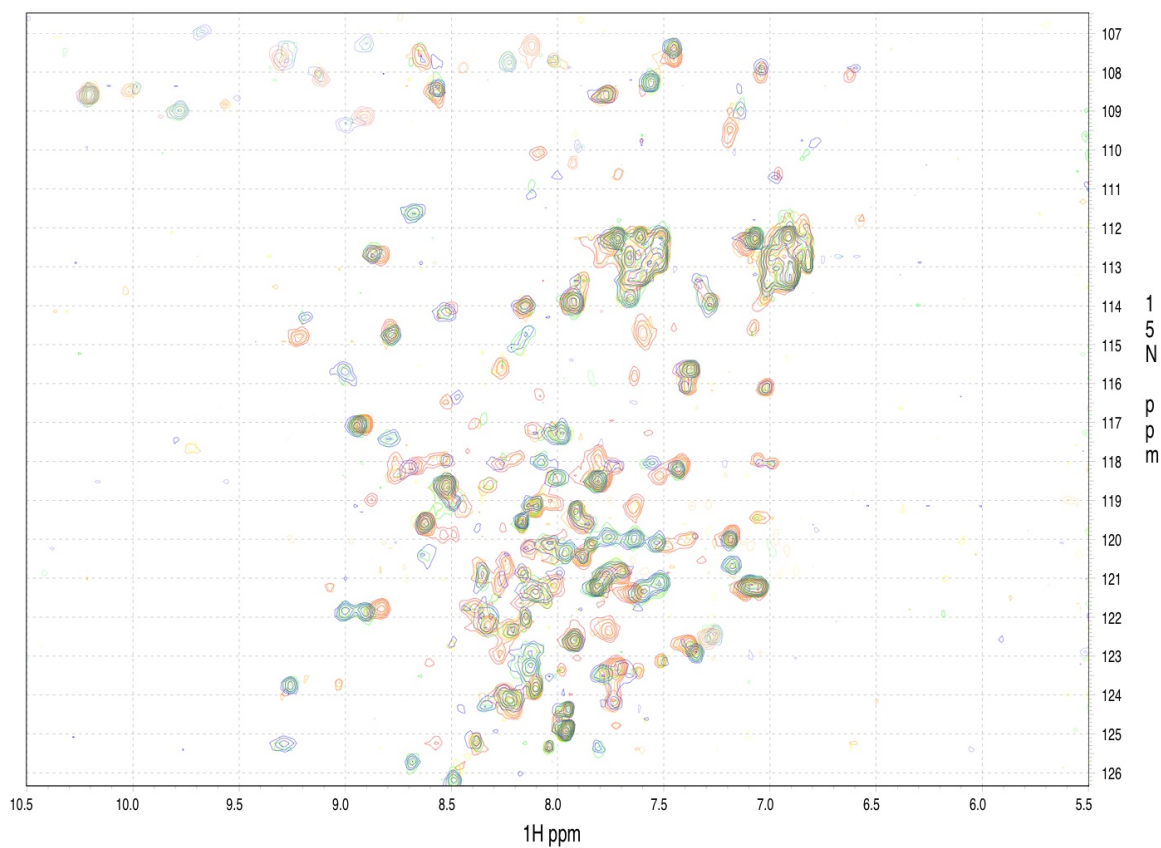

**Figure S1.** <sup>15</sup>N-HSQC NMR spectra of XIAP BIR2-BIR3 protein at 100 μM with different concentrations of SM-164 (compound **4**) (red: 0; orange: 10; yellow: 30; green: 60; blue 150 μM).

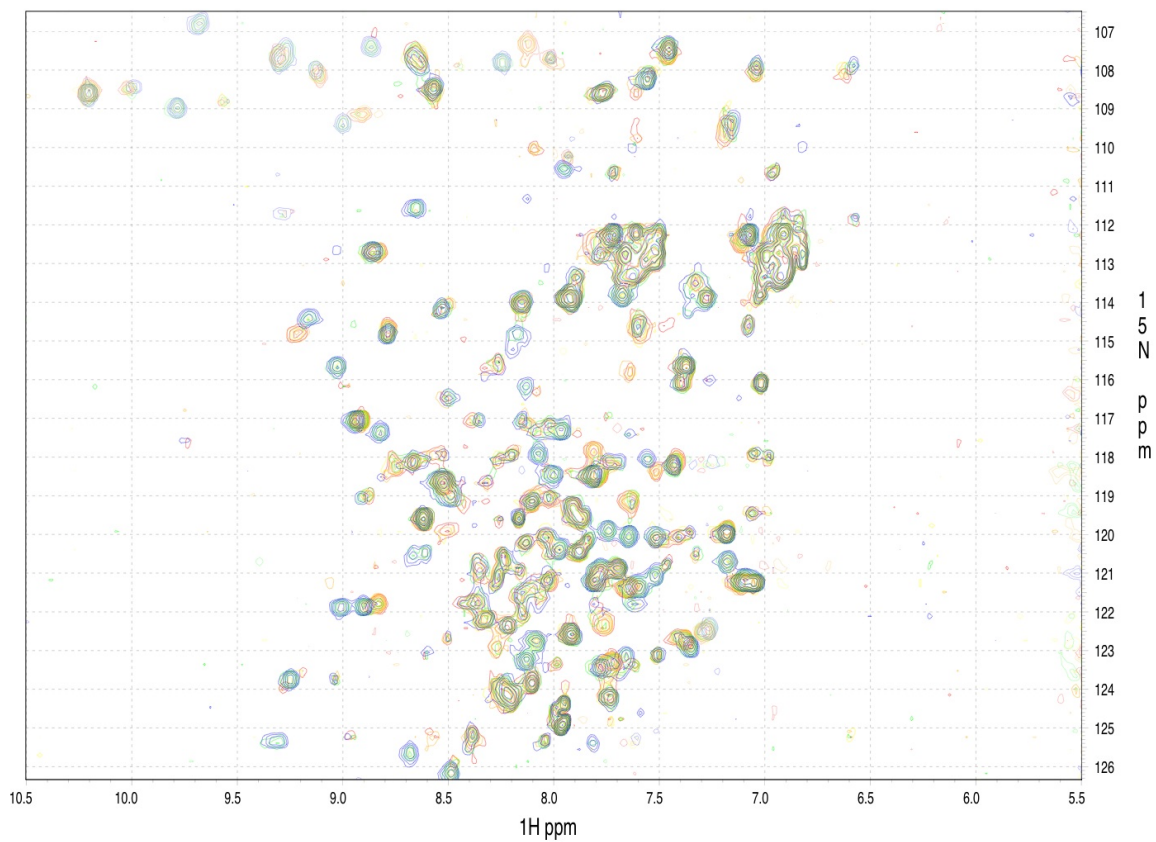

**Figure S2.**  $^{15}\text{N}$ -HSQC NMR spectra of XIAP BIR2-BIR3 protein at 100  $\mu\text{M}$  with different concentrations of SM-122 (compound **1**) (red: 0; orange: 10; yellow: 30; green: 60; blue 150  $\mu\text{M}$ ).

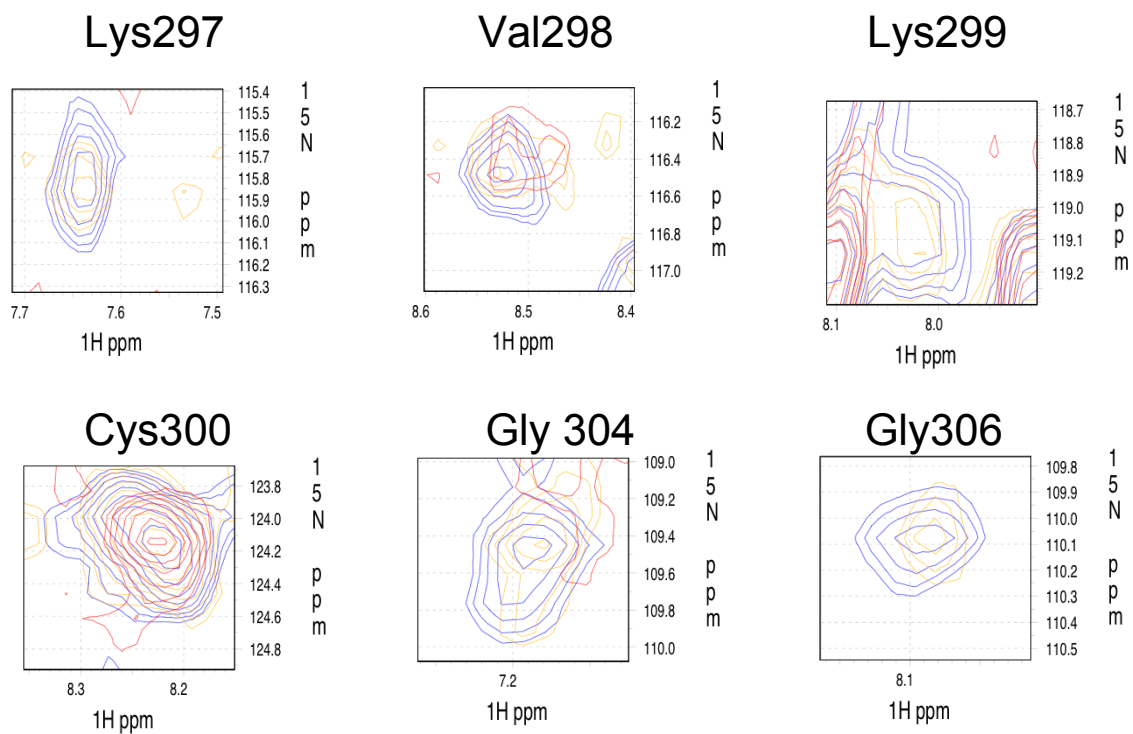

**Figure S3.**  $^{15}\text{N}$ -HSQC NMR spectra of several BIR3 residues in XIAP BIR2-BIR3 protein (100  $\mu\text{M}$ ) with different concentrations of SM-164 (red: 0; orange: 10; yellow: 30; green: 60; blue 150  $\mu\text{M}$ ).

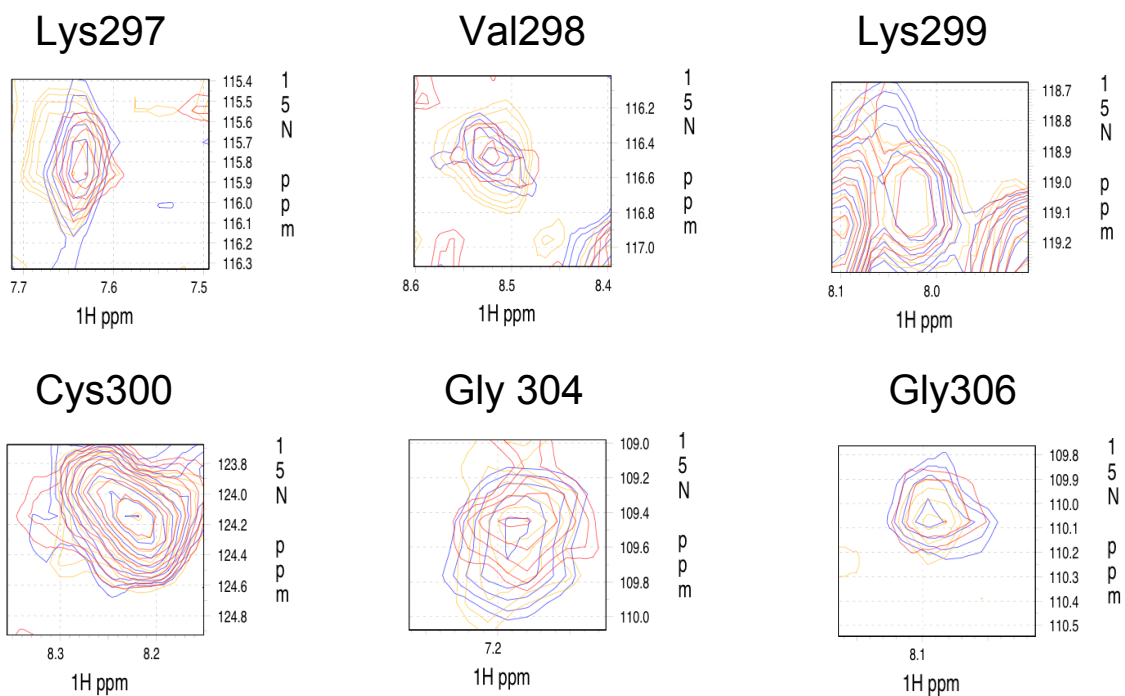

**Figure S4.**  $^{15}\text{N}$ -HSQC NMR spectra of several BIR3 residues in XIAP BIR2-BIR3 protein (100  $\mu\text{M}$ ) with different concentrations of SM-122 (red: 0; orange: 10; yellow: 30; green: 60; blue 150  $\mu\text{M}$ ).
